# Supplementary material
Source: Research Square preprint supplement (doi:10.21203/rs.3.rs-9809951/v1)
Supplement: Supplementary file 1 [file 4fa651d719bde5ee901478c5.docx]

| Supplementary Table S2. Sensitivity analysis: covariate effects on DMFT under three count specifications. Columns 1-2 (NB, ZINB) report IRR (95% CI); column 3 (hurdle linear) reports linear-scale coefficients (count component). Site, age and tobacco effects are stable in direction and magnitude across all three specifications. | | | |
| --- | --- | --- | --- |
|  | NB (primary) | ZINB | Hurdle (linear) |
| Site |  |  |  |
| Sarada | 0.66 | 0.68 | -3.69 |
|  | [0.56 0.79] | [0.59 0.79] | [-5.12 -2.27] |
| Nawaka | 1.04 | 1.13 | 1.44 |
|  | [0.81 1.34] | [0.94 1.38] | [-0.66 3.55] |
| Sex |  |  |  |
| Female | 1.08 | 1.03 | 0.29 |
|  | [0.90 1.30] | [0.89 1.20] | [-1.16 1.74] |
| Age (standardised z-score) | 1.25 | 1.17 | 1.48 |
|  | [1.13 1.39] | [1.09 1.26] | [0.76 2.20] |
| Toothbrushing |  |  |  |
| 1/day | 1.04 | 1.06 | 0.54 |
|  | [0.85 1.26] | [0.89 1.25] | [-1.04 2.13] |
| >=2/day | 1.06 | 1.00 | -0.28 |
|  | [0.79 1.42] | [0.78 1.28] | [-2.85 2.28] |
| Tobacco use |  |  |  |
| Yes | 1.17 | 1.12 | 0.98 |
|  | [0.93 1.46] | [0.92 1.35] | [-0.82 2.78] |
| Alcohol use |  |  |  |
| Yes | 1.03 | 1.01 | 0.07 |
|  | [0.85 1.23] | [0.85 1.19] | [-1.54 1.68] |
| Intercept | 8.16 | 8.94 | 8.94 |
|  | [6.51 10.23] | [7.37 10.86] | [7.00 10.89] |
| ln(α) | -1.22 | -2.13 |  |
|  | [-1.63 -0.81] | [-2.59 -1.67] |  |
| alpha | 0.29 | 0.12 |  |
|  | [0.20 0.44] | [0.08 0.19] |  |
| /sigma |  |  | 4.28 |
|  |  |  | [3.76 4.86] |
| Site |  |  |  |
| Sarada |  | 0.46 |  |
|  |  | [-0.70 1.62] |  |
| Nawaka |  | 0.56 |  |
|  |  | [-0.84 1.95] |  |
| Age (standardised z-score) |  | -0.66 |  |
|  |  | [-1.44 0.11] |  |
| Intercept |  | -2.93 |  |
|  |  | [-3.98 -1.87] |  |
| Site |  |  |  |
| Sarada |  |  | -0.27 |
|  |  |  | [-0.83 0.28] |
| Nawaka |  |  | -0.30 |
|  |  |  | [-1.03 0.42] |
| Sex |  |  |  |
| Female |  |  | 0.12 |
|  |  |  | [-0.33 0.57] |
| Age (standardised z-score) |  |  | 0.28 |
|  |  |  | [-0.03 0.58] |
| Intercept |  |  | 1.55 |
|  |  |  | [1.04 2.06] |
| Intercept |  |  | 1.45 |
|  |  |  | [1.33 1.58] |
| Number of observations | 225 | 225 | 225 |
| ZINB inflation equation: Site + Age (z-score). Hurdle selection equation: Site + Age (z-score) + Sex, lower limit at 0. All models use robust standard errors. | | | |
