# Supplementary material
Source: Research Square preprint supplement (doi:10.21203/rs.3.rs-9809951/v1)
Supplement: Supplementary file 2 [file a098b4e3c2fb3889d73080a8.docx]

| Supplementary Table S1. Model-selection comparison for the primary DMFT outcome (n = 225). NB is presented as the primary specification on grounds of interpretability of the dispersion parameter and the absence of a clearly motivated structural-zero process. Supplementary Table S2 reports the substantive stability of site, age and tobacco effects across NB, ZINB and hurdle specifications. | | | | |
| --- | --- | --- | --- | --- |
|  | Poisson | NB | ZINB | Hurdle |
| Site |  |  |  |  |
| Sarada | 0.656 | 0.662 | -0.382 | -3.694 |
| Nawaka | 1.065 | 1.045 | 0.126 | 1.445 |
| Sex |  |  |  |  |
| Female | 1.048 | 1.082 | 0.034 | 0.291 |
| Age (standardised z-score) | 1.216 | 1.249 | 0.157 | 1.478 |
| Toothbrushing |  |  |  |  |
| 1/day | 1.069 | 1.036 | 0.058 | 0.542 |
| >=2/day | 1.060 | 1.058 | -0.001 | -0.285 |
| Tobacco use |  |  |  |  |
| Yes | 1.124 | 1.165 | 0.109 | 0.978 |
| Alcohol use |  |  |  |  |
| Yes | 1.039 | 1.026 | 0.007 | 0.068 |
| Intercept | 8.200 | 8.159 | 2.191 | 8.945 |
| ln(α) |  | -1.221 | -2.129 |  |
| alpha |  | 0.295 | 0.119 |  |
| /sigma |  |  |  | 4.277 |
| Site |  |  |  |  |
| Sarada |  |  | 0.459 |  |
| Nawaka |  |  | 0.556 |  |
| Age (standardised z-score) |  |  | -0.663 |  |
| Intercept |  |  | -2.925 |  |
| Site |  |  |  |  |
| Sarada |  |  |  | -0.274 |
| Nawaka |  |  |  | -0.303 |
| Sex |  |  |  |  |
| Female |  |  |  | 0.118 |
| Age (standardised z-score) |  |  |  | 0.276 |
| Intercept |  |  |  | 1.550 |
| Intercept |  |  |  | 1.453 |
| Number of observations | 225 | 225 | 225 | 225 |
| Log pseudolikelihood | -730.45 | -651.75 | -626.17 | -625.14 |
| AIC | 1478.89 | 1323.50 | 1280.34 | 1280.27 |
| BIC | 1509.64 | 1357.66 | 1328.16 | 1331.52 |
